# Supplementary material for: Oral Administration of Chaetoceros gracilis—A Marine Microalga—Alleviates Hepatic Lipid Accumulation in Rats Fed a High-Sucrose and Cholesterol-Containing Diet
Source: MDPI journal article supplement (doi:10.3390/metabo13030436), 2023-03-16
Supplement: s1 [file s1]

**Table S6.** Content of amino acids in experimental diets.

|               | Control      | 5% <i>Chaeto</i> |
|---------------|--------------|------------------|
|               | (mg/kg diet) |                  |
| Aspartic acid | 12600        | 13145            |
| Threonine     | 8000         | 7947             |
| Serine        | 10400        | 10152            |
| Glutamic acid | 38000        | 35502            |
| Proline       | 20000        | 18340            |
| Glycine       | 3400         | 3954             |
| Alanine       | 5400         | 5997             |
| Valine        | 12400        | 11795            |
| Methionine    | 5400         | 5027             |
| Isoleucine    | 10000        | 9615             |
| Leucine       | 17000        | 16428            |
| Tyrosine      | 10400        | 9887             |
| Phenylalanine | 9200         | 9017             |
| Histidine     | 5400         | 5102             |
| Lysine        | 14400        | 13778            |
| Arginine      | 6800         | 7022             |
| Cystine       | 880          | 1169             |
| Tryptophan    | 2200         | ≤ 1936           |
