# Supplementary material for: Oral Administration of Chaetoceros gracilis—A Marine Microalga—Alleviates Hepatic Lipid Accumulation in Rats Fed a High-Sucrose and Cholesterol-Containing Diet
Source: MDPI journal article supplement (doi:10.3390/metabo13030436), 2023-03-16
Supplement: s1 [file s1]

**Table S3.** Sequences of primers used for real-time PCR.

| Gene name*                                  | Accession no. | Direction | Primer sequence (5'→3') |
|---------------------------------------------|---------------|-----------|-------------------------|
| <i>Rpl4</i>                                 | NM_022510.1   | Forward   | CCGGAAGTTGGATGAGTTGT    |
|                                             |               | Reverse   | TTTGCGTAAGGGTTCAGCTT    |
| <i>Fasn</i><br>(synonym FAS)                | NM_017332.2   | Forward   | TCAGCCACAGGACAAGC       |
|                                             |               | Reverse   | TCACCAAGCCTACCACACC     |
| <i>G6pd</i><br>(synonym G6PDH)              | NM_017006.2   | Forward   | GCAAACAGAGTGAGCCCTTC    |
|                                             |               | Reverse   | TGGCTGTTGAGGTGCTTG      |
| <i>Hmgcr</i><br>(synonym HMG-CoA reductase) | NM_013134.2   | Forward   | TCTGCAGTACCTGCCTTACAGA  |
|                                             |               | Reverse   | ATCACGTTCTCACAGCAAGC    |
| <i>Soat1</i><br>(synonym ACAT1)             | NM_031118.1   | Forward   | GATGGGGTTATGTTGCTATGC   |
|                                             |               | Reverse   | GGGCTCCTGTTTGATATTCCG   |
| <i>Scarb1</i><br>(synonym SR-B1)            | NM_031541.2   | Forward   | CCCTATGTCTACAGGGAGTTCA  |
|                                             |               | Reverse   | CCTGTCTGGCTGGAAACGAA    |
| <i>Abcal</i><br>(synonym ABCA1)             | NM_178095.3   | Forward   | AGCAGTTTGTGGCCCTCTTG    |
|                                             |               | Reverse   | AGTTCCAGGTTGGGGTACTT    |

\*Each gene name is represented by the approved symbol.

*Abcal*, ATP-binding cassette protein A1; *Fasn*, fatty acid synthase; *G6ph*, glucose-6-phosphate dehydrogenase; *Hmgcr*, 3-hydroxy-3-methylglutaryl-CoA reductase; *Rpl4*, ribosomal protein L4; *Scarb1*, scavenger receptor class B member 1; *Soat1*, sterol *O*-acyltransferase 1.
