# Supplementary material for: Oral Administration of Chaetoceros gracilis—A Marine Microalga—Alleviates Hepatic Lipid Accumulation in Rats Fed a High-Sucrose and Cholesterol-Containing Diet
Source: MDPI journal article supplement (doi:10.3390/metabo13030436), 2023-03-16
Supplement: s1 [file s1]

**Table S4.** Levels of identified water-soluble metabolites\* in the liver of SD rats.

|                                                                                      | Control       | 5% <i>Chaeto</i> |
|--------------------------------------------------------------------------------------|---------------|------------------|
| <i>Levels of water-soluble metabolites in the liver (arbitrary unit<sup>#</sup>)</i> |               |                  |
| 2-Aminobutyric acid                                                                  | 6.09 ± 0.80   | 5.47 ± 0.29      |
| 2-Deoxy-glucose                                                                      | 5.59 ± 2.25   | 7.11 ± 1.66      |
| 2-Hydroxybutyrate                                                                    | 3.65 ± 0.51   | 2.91 ± 0.52      |
| 4-Aminobutyric acid                                                                  | 22.7 ± 4.4    | 24.7 ± 2.8       |
| 4-Hydroxypyridine                                                                    | 0.258 ± 0.175 | 0.0125 ± 0.0072  |
| 5-Oxoproline                                                                         | 181 ± 14      | 165 ± 7          |
| Alanine                                                                              | 367 ± 38      | 404 ± 51         |
| Allose + Mannose                                                                     | 943 ± 44      | 925 ± 36         |
| Arabitol                                                                             | 5.14 ± 0.54   | 4.17 ± 0.65      |
| Aspartic acid                                                                        | 64.0 ± 12.4   | 72.8 ± 10.3      |
| β-Alanine                                                                            | 6.34 ± 0.50   | 5.01 ± 0.86      |
| β-Lactose                                                                            | 10.7 ± 1.0    | 11.1 ± 1.2       |
| Fructose                                                                             | 11.7 ± 0.8    | 9.16 ± 1.94      |
| Fumaric acid                                                                         | 4.90 ± 1.61   | 6.14 ± 1.75      |
| Galactitol                                                                           | 6.28 ± 1.25   | 3.42 ± 0.71      |
| Galactose                                                                            | 53.9 ± 4.1    | 46.6 ± 1.2       |
| Galactose + Glucose                                                                  | 254 ± 8       | 251 ± 6          |
| Galacturonic acid                                                                    | 5.24 ± 0.47   | 4.13 ± 0.58      |
| Gentiobiose                                                                          | 2.13 ± 0.44   | 2.27 ± 0.44      |
| Glucose                                                                              | 1063 ± 44     | 1039 ± 51        |
| Glucuronate                                                                          | 2.51 ± 0.18   | 2.16 ± 0.12      |
| Glutamic acid                                                                        | 105 ± 8       | 115 ± 18         |
| Glutamine                                                                            | 5.45 ± 1.37   | 7.34 ± 3.04      |
| Glyceric acid                                                                        | 2.48 ± 1.17   | 3.85 ± 2.02      |
| Glycine                                                                              | 211 ± 9       | 187 ± 23         |
| Hydroxyproline                                                                       | 11.1 ± 0.9    | 9.70 ± 0.75      |
| Hypoxanthine                                                                         | 19.0 ± 1.3    | 17.6 ± 2.1       |
| Iminodiacetate                                                                       | 67.5 ± 13.7   | 74.0 ± 10.1      |
| Inosine                                                                              | 55.7 ± 7.2    | 49.5 ± 10.4      |
| Isoleucine                                                                           | 45.8 ± 5.5    | 47.6 ± 6.3       |

|                               |             |             |
|-------------------------------|-------------|-------------|
| Lactic acid                   | 589 ± 34    | 609 ± 49    |
| Lactitol                      | 100 ± 12    | 114 ± 15    |
| Leucine                       | 118 ± 12    | 123 ± 16    |
| Lysine                        | 21.2 ± 2.5  | 23.4 ± 6.4  |
| Malic acid                    | 19.6 ± 5.7  | 24.4 ± 6.8  |
| Maltose                       | 262 ± 25    | 287 ± 36    |
| Maltotriose                   | 444 ± 35    | 450 ± 41    |
| Melezitose                    | 3.78 ± 0.27 | 3.69 ± 0.27 |
| Methionine                    | 12.8 ± 1.9  | 12.8 ± 1.9  |
| <i>O</i> -Phosphoethanolamine | 10.6 ± 1.0  | 10.3 ± 1.4  |
| Ornithine                     | 8.10 ± 0.40 | 6.21 ± 1.58 |
| Oxalate                       | 4.22 ± 1.04 | 6.88 ± 1.95 |
| Phenylalanine                 | 13.3 ± 1.6  | 14.1 ± 2.2  |
| Phosphate                     | 911 ± 20    | 939 ± 55    |
| Phosphoenolpyruvic acid       | 7.13 ± 0.66 | 6.74 ± 1.29 |
| Palmitic acid                 | 13.8 ± 2.6  | 15.3 ± 1.1  |
| Proline                       | 19.8 ± 2.6  | 21.4 ± 5.8  |
| Ribitol                       | 7.13 ± 0.60 | 6.58 ± 0.34 |
| Ribose                        | 29.5 ± 5.7  | 30.0 ± 6.4  |
| Serine                        | 68.8 ± 6.8  | 72.6 ± 12.4 |
| Sorbitol                      | 6.13 ± 1.16 | 3.24 ± 0.75 |
| Sorbose                       | 10.4 ± 0.5  | 8.19 ± 1.70 |
| Stearic acid                  | 15.5 ± 2.9  | 17.5 ± 1.2  |
| Taurine                       | 20.6 ± 1.2  | 22.3 ± 1.6  |
| Threonine                     | 28.0 ± 2.1  | 27.4 ± 3.2  |
| Trehalose                     | 73.0 ± 6.9  | 81.3 ± 10.0 |
| Tyrosine                      | 42.7 ± 3.8  | 43.1 ± 5.5  |
| Uracil                        | 4.13 ± 0.89 | 6.00 ± 1.66 |
| Uric acid                     | 3.63 ± 2.45 | 4.17 ± 1.99 |
| Uridine                       | 17.1 ± 0.8  | 17.5 ± 0.8  |
| Valine                        | 61.8 ± 6.2  | 65.5 ± 9.7  |
| Xanthine                      | 29.2 ± 1.2  | 28.5 ± 2.9  |
| Xylonic acid                  | 3.19 ± 1.51 | 3.73 ± 0.89 |

---

Values are means  $\pm$  SEM ( $n = 6-7$  group).

\*The 63 metabolites with CV% less than 10% are shown.

#Relative quantity of each metabolite was calculated using the peak area of each metabolite relative to an internal standard (2-isopropylmalic acid).
