# Supplementary material for: Oral Administration of Chaetoceros gracilis—A Marine Microalga—Alleviates Hepatic Lipid Accumulation in Rats Fed a High-Sucrose and Cholesterol-Containing Diet
Source: MDPI journal article supplement (doi:10.3390/metabo13030436), 2023-03-16
Supplement: s1 [file s1]

**Table S5.** Levels of identified water-soluble metabolites\* in soleus muscle of SD rats.

|                                                                                          | Control       | 5% <i>Chaeto</i> |
|------------------------------------------------------------------------------------------|---------------|------------------|
| <i>Levels of water-soluble metabolites in soleus muscle (arbitrary unit<sup>#</sup>)</i> |               |                  |
| 2-Aminobutyric acid                                                                      | 11.6 ± 1.7    | 12.3 ± 3.0       |
| 2-Hydroxybutyrate                                                                        | 1.33 ± 0.49   | 1.30 ± 0.58      |
| 2-Hydroxypyridine                                                                        | 56.7 ± 3.8    | 56.2 ± 2.7       |
| 4-Methylbenzoic acid                                                                     | 1.38 ± 0.67   | 0.408 ± 0.045    |
| 5-Oxoproline                                                                             | 220 ± 18      | 265 ± 21         |
| Alanine                                                                                  | 759 ± 41      | 914 ± 195        |
| Allose + Mannose                                                                         | 131 ± 9       | 127 ± 12         |
| Fructose 6-phosphate                                                                     | 5.24 ± 2.89   | 1.54 ± 0.08      |
| Fructose                                                                                 | 6.23 ± 0.85   | 5.59 ± 1.68      |
| Fumaric acid                                                                             | 17.2 ± 3.1    | 25.9 ± 2.5       |
| Galactose + Glucose                                                                      | 32.3 ± 1.7    | 34.0 ± 1.5       |
| Glucuronate                                                                              | 0.289 ± 0.232 | 0.441 ± 0.420    |
| Glutamine                                                                                | 49.8 ± 5.6    | 73.6 ± 10.7      |
| Hydroxyproline                                                                           | 5.07 ± 1.03   | 8.22 ± 1.18      |
| Inosine 5'-phosphate                                                                     | 161 ± 9       | 187 ± 14         |
| Inositol                                                                                 | 18.9 ± 2.5    | 14.0 ± 1.5       |
| Lactic acid                                                                              | 3656 ± 125    | 3981 ± 172       |
| Malic acid                                                                               | 28.4 ± 5.1    | 39.2 ± 3.9       |
| Oxamic acid                                                                              | 132 ± 22      | 149 ± 15         |
| Phosphate                                                                                | 2348 ± 122    | 2612 ± 144       |
| Palmitic acid                                                                            | 12.4 ± 2.6    | 9.07 ± 1.31      |
| Proline                                                                                  | 23.0 ± 3.7    | 36.2 ± 4.9       |
| Stearic acid                                                                             | 17.2 ± 4.0    | 11.1 ± 1.8       |
| Succinic acid                                                                            | 15.9 ± 3.6    | 14.0 ± 1.9       |
| Taurine                                                                                  | 455 ± 19      | 434 ± 33         |
| Tryptophan                                                                               | 0.293 ± 0.042 | 2.71 ± 1.51      |
| Tyrosine                                                                                 | 90.5 ± 4.3    | 127 ± 19         |
| Urea                                                                                     | 158 ± 7       | 152 ± 18         |
| Urocanate                                                                                | 29.8 ± 16.0   | 15.1 ± 9.2       |
| Xanthine                                                                                 | 10.6 ± 1.3    | 18.0 ± 3.8       |

---

Values are means  $\pm$  SEM ( $n = 6-7$  group).

\*The 30 metabolites with CV% less than 10% are shown.

#Relative quantity of each metabolite was calculated using the peak area of each metabolite relative to an internal standard (2-isopropylmalic acid).
