# Supplementary material for: Oral Administration of Chaetoceros gracilis—A Marine Microalga—Alleviates Hepatic Lipid Accumulation in Rats Fed a High-Sucrose and Cholesterol-Containing Diet
Source: MDPI journal article supplement (doi:10.3390/metabo13030436), 2023-03-16
Supplement: s1 [file s1]

**Table S1.** Amino acid contents of *C. gracilis*.

---

|                          |      |
|--------------------------|------|
| Contents (mg/100 g d.w.) |      |
| Aspartic acid            | 4140 |
| Threonine                | 1830 |
| Serine                   | 2020 |
| Glutamic acid            | 4200 |
| Proline                  | 1520 |
| Glycine                  | 1930 |
| Alanine                  | 2500 |
| Valine                   | 1790 |
| Methionine               | 560  |
| Isoleucine               | 1650 |
| Leucine                  | 2970 |
| Tyrosine                 | 1490 |
| Phenylalanine            | 1860 |
| Histidine                | 710  |
| Lysine                   | 2240 |
| Arginine                 | 2090 |
| Cystine                  | 790  |
| Tryptophan               | ≤ 4  |

---

d.w., dry weight.
