# Supplementary material for: Oral Administration of Chaetoceros gracilis—A Marine Microalga—Alleviates Hepatic Lipid Accumulation in Rats Fed a High-Sucrose and Cholesterol-Containing Diet
Source: MDPI journal article supplement (doi:10.3390/metabo13030436), 2023-03-16
Supplement: s1 [file s1]

**Table S2.** Fatty acid contents of *C. gracilis*.

---

|                                           |      |
|-------------------------------------------|------|
| Contents (mg/100 g d.w.)                  |      |
| Myristic acid (C14:0)                     | 1352 |
| Palmitic acid (C16:0)                     | 2520 |
| Heptadecanoic acid (C17:0)                | 425  |
| Stearic acid (C18:0)                      | 789  |
| Palmitoleic acid (C16:1 <i>n</i> -7)      | 3256 |
| Oleic acid (C18:1 <i>n</i> -9)            | 1157 |
| Linolenic acid (C18:2 <i>n</i> -6)        | 97   |
| Arachidonic acid (C20:4 <i>n</i> -6)      | 104  |
| Eicosapentaenoic acid (C20:5 <i>n</i> -3) | 2535 |
| Docosahexaenoic acid (C22:6 <i>n</i> -3)  | 180  |

---

d.w., dry weight.
